# Supplementary material
Source: PubMed Central journal article supplement (PMC2708894)
Supplement: supp_M900146200_Supplegend.pdf [file supp_M900146200_Supplegend.pdf]

**LEGEND SUPPLEMENTAL FIGURE 1. Activated p38MAPK colocalizes with Bcl-2 in infected cells.** Confocal microscopic images of MDCKBcl-2 and SH-SY5Y cells collected 8 h after infection with PR8 (m.o.i. 1.5), fixed, and labeled with antibodies against Bcl-2 (red fluorescence) or phosphorylated p38MAPK (green fluorescence). Merged images of the infected cell lines are shown in figure. The squared portions of the merged images are enlarged in the right panels: the yellow arrows indicate the punctiform Bcl-2 staining reflecting its mitochondrial localization; the turquoise arrows indicate p38MAPK fluorescence diffusely distributed throughout the cytoplasm; the white arrows indicate Bcl-2/p38MAPK colocalization.
